# Supplementary material for: Interaction between Vitamin D-Related Genetic Risk Score and Carbohydrate Intake on Body Fat Composition: A Study in Southeast Asian Minangkabau Women
Source: PubMed Central journal article supplement (PMC7911469; doi:10.3390/nu13020326), 2021-01-23
Supplement: nutrients-13-00326-s001.pdf [file nutrients-13-00326-s001.pdf]

**Supplementary Table S1.** Genotypic and allelic frequencies of the single nucleotide polymorphisms that were used to create the genetic risk score.

| Gene Symbols | Single Nucleotide Polymorphisms | Nucleotide Change | Total | Common Homozygotes | Heterozygotes | Rare Homozygotes | Hardy Weinberg Equilibrium $p$ Value | Minor Allele Frequency | Minor Allele and Frequency in East Asians (dbSNP* -EAS) | Minor Allele and Frequency in Europeans (dbSNP* -EUR) | Minor Allele and Frequency in South Asian (dbSNP* -SAS) |
|--------------|---------------------------------|-------------------|-------|--------------------|---------------|------------------|--------------------------------------|------------------------|---------------------------------------------------------|-------------------------------------------------------|---------------------------------------------------------|
| FTO          | rs8050136                       | A/C               | 115   | CC: 69             | CA: 39        | AA: 7            | 0.64                                 | A= 0.23                | A (0.17)                                                | A (0.41)                                              | A (0.29)                                                |
|              | rs9939609                       | A/T               | 116   | TT: 70             | TA: 39        | AA: 7            | 0.62                                 | A= 0.23                | A (0.17)                                                | A (0.41)                                              | A (0.29)                                                |
|              | rs10163409                      | T/A               | 117   | AA: 106            | TA: 11        | TT: 0            | 0.59                                 | T= 0.05                | T (0.03)                                                | T (0.31)                                              | T (0.20)                                                |
| TCF7L2       | rs12255372                      | T/G               | 117   | GG: 97             | TG: 20        | TT: 0            | 0.31                                 | T= 0.09                | T (0.01)                                                | T (0.29)                                              | T (0.22)                                                |
|              | rs7903146                       | T/C               | 116   | CC: 95             | TC: 21        | TT: 0            | 0.28                                 | T= 0.09                | T (0.02)                                                | T (0.32)                                              | T (0.30)                                                |
| MC4R         | rs17782313                      | C/T               | 117   | TT: 89             | TC: 26        | CC: 2            | 0.95                                 | C= 0.13                | C (0.19)                                                | C (0.24)                                              | C (0.32)                                                |
|              | rs2229616                       | A/G               | 117   | GG: 116            | GA: 1         | AA: 0            | 0.96                                 | A= 0.00                | A (0.02)                                                | A (0.01)                                              | A (0.03)                                                |
| KCNQ1        | rs2237895                       | C/A               | 115   | AA: 58             | CA: 46        | CC: 11           | 0.67                                 | C= 0.30                | C (0.33)                                                | C (0.42)                                              | C (0.40)                                                |
|              | rs2237892                       | T/C               | 117   | CC: 44             | TC: 53        | TT: 20           | 0.56                                 | T= 0.40                | T (0.36)                                                | T (0.06)                                              | T (0.01)                                                |
| CDKN2A/B     | rs10811661                      | C/T               | 116   | TT: 50             | CT: 57        | CC: 9            | 0.19                                 | C= 0.32                | C (0.44)                                                | C (0.17)                                              | C (0.13)                                                |
| DHCR7        | rs12785878                      | T/G               | 117   | GG: 73             | TG: 36        | TT: 8            | 0.23                                 | T= 0.22                | T (0.38)                                                | G (0.30)                                              | T (0.15)                                                |
| CYP2R1       | rs12794714                      | A/G               | 117   | GG: 62             | GA: 50        | AA: 5            | 0.19                                 | A= 0.26                | A (0.37)                                                | A (0.45)                                              | A (0.44)                                                |
| CYP24A1      | rs6013897                       | A/T               | 116   | TT: 54             | TA: 48        | AA: 14           | 0.51                                 | A= 0.33                | A (0.15)                                                | A (0.24)                                              | A (0.33)                                                |
| GC           | rs2282679                       | C/A               | 115   | AA: 77             | CA: 33        | CC: 5            | 0.55                                 | C= 0.19                | C (0.26)                                                | C (0.25)                                              | C (0.30)                                                |
| CASR         | rs1801725                       | T/G               | 117   | GG: 96             | TG: 19        | TT: 2            | 0.36                                 | T= 0.10                | T (0.04)                                                | T (0.15)                                              | T (0.21)                                                |

\*dbSNP database: <https://www.ncbi.nlm.nih.gov/snp/> [1].

**Supplementary Table S2.** Association of vitamin D-GRS with 25-hydroxyvitamin D concentrations and clinical and biochemical measurements.

| Clinical and Biochemical Parameters | GRS $\leq 2$ |                  | GRS $> 2$ |                  | $p$ Value |
|-------------------------------------|--------------|------------------|-----------|------------------|-----------|
|                                     | $n$          | Mean $\pm$ SD    | $n$       | Mean $\pm$ SD    |           |
| 25-hydroxyvitamin D (ng/ml)         | 67           | 1.24 $\pm$ 0.20  | 43        | 1.25 $\pm$ 0.20  | 0.93      |
| BMI (kg/m <sup>2</sup> )            | 67           | 25.05 $\pm$ 4.12 | 43        | 25.41 $\pm$ 4.47 | 0.70      |
| WC (cm)                             | 67           | 1.90 $\pm$ 0.14  | 43        | 1.92 $\pm$ 0.07  | 0.59      |
| BFP (%)                             | 67           | 1.54 $\pm$ 0.09  | 43        | 1.56 $\pm$ 0.10  | 0.30      |
| Glucose (mg/dl)                     | 67           | 1.96 $\pm$ 0.08  | 43        | 1.96 $\pm$ 0.06  | 0.99      |
| HbA1c (ng/ml)                       | 67           | 2.67 $\pm$ 0.27  | 43        | 2.74 $\pm$ 0.32  | 0.19      |
| Fasting Insulin (nmlU/L)            | 67           | 4.39 $\pm$ 0.23  | 43        | 4.46 $\pm$ 0.28  | 0.15      |
| Total Cholesterol (mg/dl)           | 67           | 2.32 $\pm$ 0.09  | 43        | 2.30 $\pm$ 0.09  | 0.12      |
| HDL Cholesterol (mg/dl)             | 67           | 1.77 $\pm$ 0.08  | 43        | 1.77 $\pm$ 0.07  | 1.00      |
| LDL Cholesterol (mg/dl)             | 67           | 2.10 $\pm$ 0.18  | 43        | 2.05 $\pm$ 0.17  | 0.16      |
| Serum Triglycerides (mg/dl)         | 67           | 2.00 $\pm$ 0.1.8 | 43        | 2.00 $\pm$ 0.1.8 | 0.79      |

All variables were log transformed except for BMI values which were in normal distribution. All associations were adjusted for location, age and BMI (except BMI which was not adjusted for when the outcome was BMI). Abbreviations: GRS: genetic risk score, BMI: body mass index, WC: waist circumference, BFP: body fat percentage, HbA1c: glycated haemoglobin, HDL: high density lipoprotein, LDL: low density lipoprotein.

**Supplementary Table S3.** Interactions between metabolic-GRS and dietary factors on clinical and biochemical measurements.

| Clinical and Biochemical Parameters | Carbohydrate (g)                | Protein (g)                     | Fat (g)                         | Fibre (g)                       |
|-------------------------------------|---------------------------------|---------------------------------|---------------------------------|---------------------------------|
|                                     | <i>p</i> <sub>interaction</sub> | <i>p</i> <sub>interaction</sub> | <i>p</i> <sub>interaction</sub> | <i>p</i> <sub>interaction</sub> |
| 25-hydroxyvitamin D (ng/ml)         | 0.83                            | 0.93                            | 1.00                            | 0.68                            |
| BMI (kg/m <sup>2</sup> )            | 0.34                            | 0.91                            | 0.34                            | 0.56                            |
| WC (cm)                             | 0.58                            | 0.10                            | 0.15                            | 0.47                            |
| BFP (%)                             | 0.32                            | 0.70                            | 0.96                            | 0.84                            |
| Glucose (mg/dl)                     | 0.36                            | 0.56                            | 0.70                            | 0.83                            |
| HbA1c (ng/ml)                       | 0.78                            | 0.68                            | 0.78                            | 0.53                            |
| Fasting Insulin (nmlU/L)            | 0.63                            | 0.22                            | 0.44                            | 0.44                            |
| Total Cholesterol (mg/dl)           | 0.17                            | 0.52                            | 0.32                            | 0.21                            |
| HDL Cholesterol (mg/dl)             | 0.18                            | 0.52                            | 0.70                            | 0.65                            |
| LDL Cholesterol (mg/dl)             | 0.34                            | 0.95                            | 0.85                            | 0.55                            |
| Serum Triglycerides (mg/dl)         | 0.95                            | 0.54                            | 0.77                            | 0.38                            |

All variables were log transformed except for BMI values which had a normal distribution. All interactions were adjusted for age, location, total energy intake, and BMI (except BMI which was not adjusted for when the outcome was BMI). Abbreviations: BMI: body mass index, WC: waist circumference, BFP: body fat percentage, HbA1c: glycated haemoglobin, HDL: high density lipoprotein, LDL: low density lipoprotein.

## References

1. National Center for Biotechnology Information. <https://www.ncbi.nlm.nih.gov/snp/>.
